# Supplementary material for: Prediction of hepatocellular carcinoma using age and liver stiffness on transient elastography after hepatitis C virus eradication
Source: PubMed Central journal article supplement (PMC8795443; doi:10.1038/s41598-022-05492-5), 2022-01-27
Supplement: 41598_2022_5492_MOESM1_ESM.pdf [file 41598_2022_5492_MOESM1_ESM.pdf]

**Supplemental Figure 1** Liver stiffness measurement (LSM) before HCV treatment and at the time of SVR24

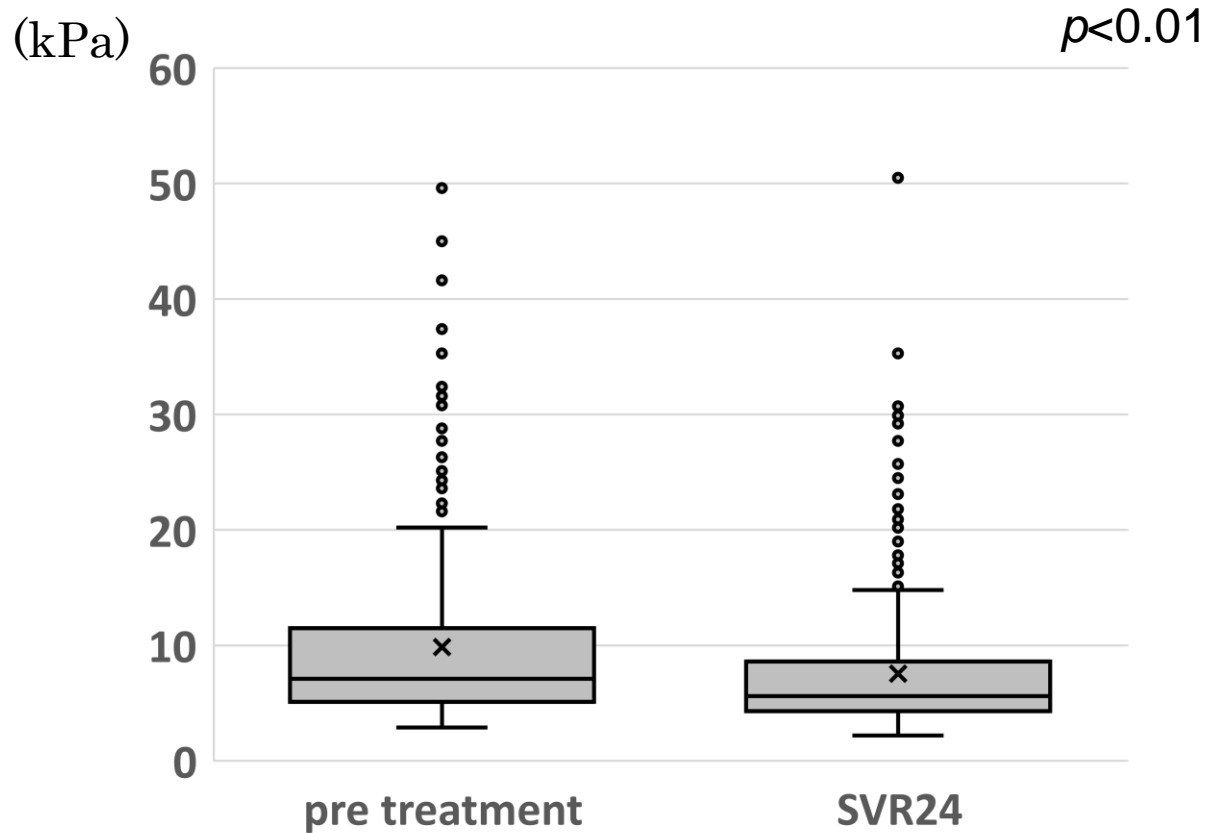

In the box charts for the Y-axis, the bold lines indicate the median, “x” indicates the average, boxes indicate the 25th and 75th percentiles, and lines for each edge indicate the 10th and 90th percentiles.

*HCV*, hepatitis C; *SVR24*, sustained virological response at 24 weeks.

**Supplemental Figure 2** Cumulative incidence of hepatocellular carcinoma after IFN-free treatment in patients with low LSM divided by age

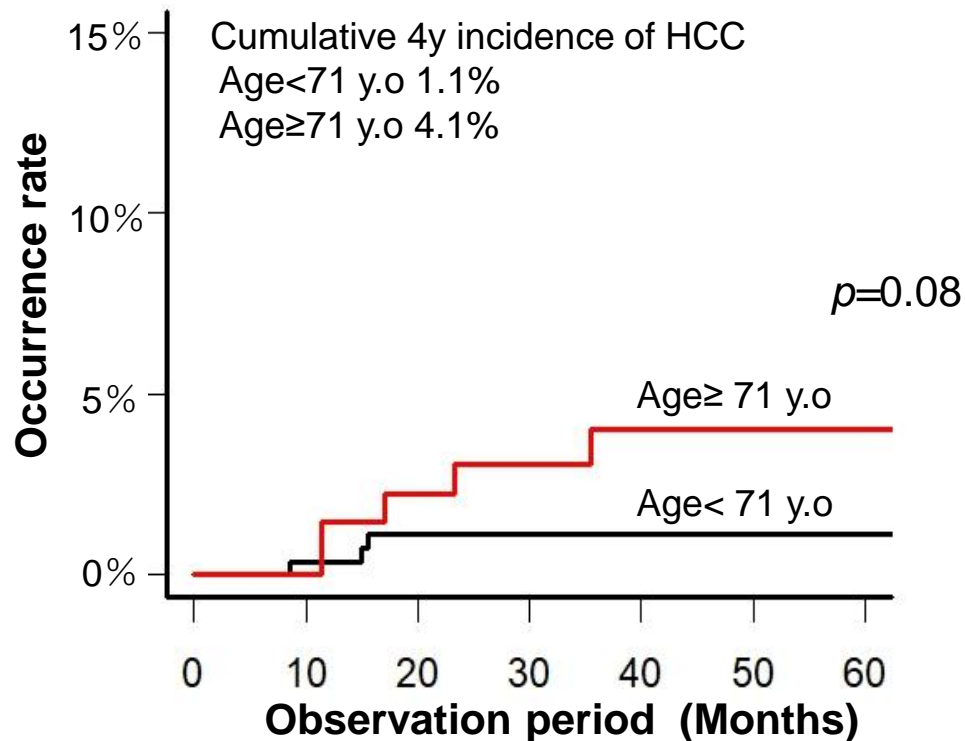

Number at risk

|                      |     |     |     |     |     |     |    |
|----------------------|-----|-----|-----|-----|-----|-----|----|
| <b>Age&lt;71 y.o</b> | 275 | 268 | 241 | 202 | 173 | 133 | 47 |
| <b>Age≥71 y.o</b>    | 143 | 137 | 129 | 104 | 88  | 72  | 20 |

Cumulative incidence of hepatocellular carcinoma in patients with LSM <8.4 kPa at the time of SVR24 divided according to age of 71 years as the cut-off value. The black line indicates those younger than 71 years, and the red line indicates those older than 71 years.

*IFN*, interferon; *HCC*, hepatocellular carcinoma; *LSM*, liver stiffness measurement; *SVR24*, sustained virological response at 24 weeks

# *Supplemental Figure 3* ROC curve analysis of age and prediction of HCC

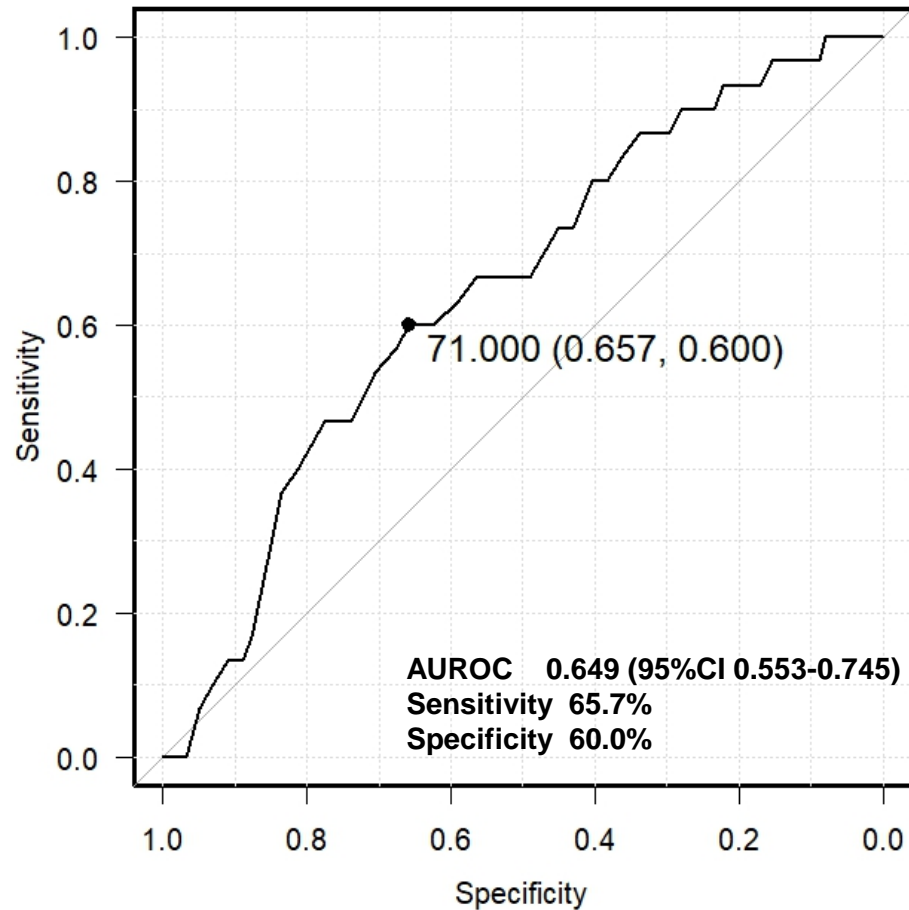

The ROC curve showing age as a predictor of HCC after SVR with IFN-free treatment.  
*ROC*, receiver operating characteristic; *HCC*, hepatocellular carcinoma
